# Supplementary material
Source: ML conference proceedings conference paper supplement (https://proceedings.neurips.cc/paper_files/paper/2020/hash/c28e5b0c9841b5ef396f9f519bf6c217-Abstract.html)
Supplement: Supplementary file [file c28e5b0c9841b5ef396f9f519bf6c217-Supplemental.pdf]

---

# –Supplementary Material–

## AViD Dataset: Anonymized Videos from Diverse Countries

---

**AJ Piergiovanni**  
Indiana University  
ajpiergi@indiana.edu

**Michael S. Ryoo**  
Stony Brook University  
mryoo@cs.stonybrook.edu

### A Diversity Statistics Collection

In order to find the country location for each video in previous YouTube-based datasets (e.g., Kinetics, HACS, etc.), we used the public YouTube API. Specifically, using <https://developers.google.com/youtube/v3/docs/videos>, we extracted the ‘recordingDetails.location’ object. Importantly, it notes that

‘The geolocation information associated with the video. Note that the `child` property values identify the location that the video owner wants to associate with the video. The value is editable, searchable on public videos, and might be displayed to users for public videos.’

This is the only location data YouTube publicly provides and many videos in existing datasets do not have this field. In our measure, roughly 8% of the videos had such geolocation. We then used reverse-geocode library <https://pypi.org/project/reverse-geocode/> to map the coordinates to the country, then manually mapped the countries to each region.

For full transparency, we provide detailed breakdowns of the diversity data we were able to measure with these tools in Table 1 as an example.

| Country       | Video Count |
|---------------|-------------|
| North America | 32,767      |
| EU            | 1,613       |
| Latin America | 2,289       |
| Asia          | 938         |
| Africa        | 37          |
| No Location   | 422,645     |

Table 1: Kinetics-400 Video Distribution

### B Difference to Kinetics Numbers

After the initial version of AViD was released (on arXiv), the Kinetics team provided numbers based on the estimated upload location of the video (this metadata is not publicly available) (Smaira et al., 2020).

In the paper, we have included their diversity statistics as well, as they are more complete, representing 90% of videos, compared to about 8% that we were able to get geolocation for.

## References

L. Smaira, J. Carreira, E. Noland, E. Clancy, A. Wu, and A. Zisserman. A short note on the kinetics-700-2020 human action dataset, 2020.

## C Action Classes

1. abseiling
2. acoustic guitar
3. acrobatic gymnastics
4. acting in play
5. adjusting glasses
6. aerobics
7. air drumming
8. air travel
9. airbrush
10. alligator wrestling
11. alpine climbing
12. alpine skiing
13. amusement park
14. answering questions
15. applauding
16. applying cream
17. archaeological excavation
18. archery
19. arguing
20. arm wrestling
21. arranging flowers
22. arresting
23. assembling bicycle
24. assembling computer
25. attending conference
26. auctioning
27. baby transport
28. baby waking up
29. backflip (human)
30. backpacking (wilderness)
31. baking
32. baking cookies
33. balance beam
34. balloon blowing
35. bandaging
36. barbell
37. barbequing
38. bartending
39. base jumping
40. bathing
41. bathing dog
42. batting (cricket)
43. batting cage
44. battle rope training
45. beatboxing
46. bee keeping
47. belly dancing
48. bench pressing
49. bending back
50. bending metal
51. biceps curl
52. bicycling
53. biking through snow
54. blasting sand
55. blending fruit
56. blowing glass
57. blowing leaves
58. blowing nose
59. blowing out candles
60. bmx bike
61. boating
62. bobsledding
63. body piercing
64. bodyboarding
65. bodysurfing
66. bodyweight exercise
67. bookbinding
68. bottling
69. bouncing ball
70. bouncing ball (not juggling)
71. bouncing on bouncy castle
72. bouncing on trampoline
73. bowling
74. bowling (cricket)
75. braiding hair
76. breeding or breadcrumbing
77. breakdancing
78. breaking

79. breaking boards
80. breaking glass
81. breathing fire
82. brush painting
83. brushing hair
84. brushing teeth
85. building cabinet
86. building lego
87. building sandcastle
88. building shed
89. bull fighting
90. bulldozer
91. bulldozing
92. bungee jumping
93. burping
94. busking
95. buttoning
96. cake decorating
97. calculating
98. calligraphy
99. camping
100. canoeing or kayaking
101. capoeira
102. caporales
103. capsizing
104. card stacking
105. card throwing
106. card tricks
107. carp fishing
108. carrying baby
109. carrying weight
110. cartwheeling
111. carving ice
112. carving marble
113. carving pumpkin
114. carving wood with a knife
115. casting fishing line
116. catching fish
117. catching or throwing baseball
118. catching or throwing frisbee
119. catching or throwing softball
120. celebrating
121. changing gear in car
122. changing oil
123. changing wheel
124. chasing
125. checking tires
126. checking watch
127. cheerleading
128. chiseling stone
129. chiseling wood
130. chopping meat
131. chopping vegetables
132. chopping wood
133. christmas
134. circus
135. clam digging
136. clay pottery making
137. clean and jerk
138. cleaning floor
139. cleaning gutters
140. cleaning pool
141. cleaning shoes
142. cleaning toilet
143. cleaning windows
144. climbing a rope
145. climbing ladder
146. climbing tree
147. closing door
148. coloring in
149. combat
150. comedian
151. concert
152. construction
153. contact juggling
154. contorting
155. cooking
156. cooking chicken
157. cooking egg
158. cooking on campfire
159. cooking sausages
160. cooking sausages (not on barbeque)
161. cooking scallops
162. cooking show
163. cosplaying
164. counting money
165. country line dancing
166. cracking knuckles
167. cracking neck

168. crawling baby
169. cricket
170. crocheting
171. crossing river
172. crouching
173. crying
174. cumbia
175. curling (sport)
176. curling hair
177. cutting apple
178. cutting cake
179. cutting nails
180. cutting orange
181. cutting pineapple
182. cutting watermelon
183. dancing
184. dancing ballet
185. dancing charleston
186. dancing gangnam style
187. dancing macarena
188. dashcam
189. deadlifting
190. dealing cards
191. decorating the christmas tree
192. decoupage
193. delivering mail
194. demolition
195. digging
196. dining
197. directing traffic
198. dirt track racing
199. disc golfing
200. disc jockey
201. diving cliff
202. docking boat
203. dodgeball
204. dog agility
205. doing aerobics
206. doing jigsaw puzzle
207. doing laundry
208. doing nails
209. doing sudoku
210. doing wheelie
211. drag racing
212. drawing
213. dressage
214. dribbling basketball
215. drifting (motorsport)
216. drinking
217. drinking beer
218. drinking shots
219. driving car
220. driving tractor
221. drooling
222. drop kicking
223. drumming fingers
224. dumbbell
225. dump truck
226. dumpster diving
227. dune buggy
228. dunking basketball
229. dying hair
230. eating burger
231. eating cake
232. eating carrots
233. eating chips
234. eating doughnuts
235. eating hotdog
236. eating ice cream
237. eating nachos
238. eating spaghetti
239. eating street food
240. eating watermelon
241. egg hunting
242. electric guitar
243. embroidering
244. embroidery
245. enduro
246. entering church
247. exercising arm
248. exercising with an exercise ball
249. explosion
250. extinguishing fire
251. extreme sport
252. faceplanting
253. falling off bike
254. falling off chair
255. feeding birds
256. feeding fish

- 257. feeding goats
- 258. building fence
- 259. fencing (sport)
- 260. festival
- 261. fidgeting
- 262. field hockey
- 263. figure skating
- 264. filling cake
- 265. filling eyebrows
- 266. finger snapping
- 267. fingerboard (skateboard)
- 268. firefighter
- 269. fireworks
- 270. fixing bicycle
- 271. fixing hair
- 272. flamenco
- 273. flint knapping
- 274. flipping bottle
- 275. flipping pancake
- 276. fly tying
- 277. flying kite
- 278. folding clothes
- 279. folding napkins
- 280. folding paper
- 281. forklift
- 282. french horn
- 283. front raises
- 284. frying
- 285. frying vegetables
- 286. gambling
- 287. garbage collecting
- 288. gardening
- 289. gargling
- 290. geocaching
- 291. getting a haircut
- 292. getting a piercing
- 293. getting a tattoo
- 294. giving or receiving award
- 295. gliding
- 296. go-kart
- 297. gold panning
- 298. golf chipping
- 299. golf driving
- 300. golf putting
- 301. gospel singing in church
- 302. greeting
- 303. grinding meat
- 304. grooming cat
- 305. grooming dog
- 306. grooming horse
- 307. gymnastics
- 308. gymnastics tumbling
- 309. hammer throw
- 310. hand washing clothes
- 311. head stand
- 312. headbanging
- 313. headbutting
- 314. heavy equipment
- 315. helmet diving
- 316. herding cattle
- 317. high fiving
- 318. high jump
- 319. high kick
- 320. hiking
- 321. historical reenactment
- 322. hitchhiking
- 323. hitting baseball
- 324. hockey stop
- 325. holding snake
- 326. home improvement
- 327. home roasting coffee
- 328. hopscotch
- 329. horse racing
- 330. hoverboarding
- 331. huddling
- 332. hugging
- 333. hugging (not baby)
- 334. hugging baby
- 335. hula hooping
- 336. hunting
- 337. hurdling
- 338. hurling (sport)
- 339. ice climbing
- 340. ice dancing
- 341. ice fishing
- 342. ice skating
- 343. ice swimming
- 344. inflating balloons
- 345. installing carpet

346. ironing
347. ironing hair
348. javelin throw
349. jaywalking
350. jetskiing
351. jogging
352. juggling
353. juggling balls
354. juggling fire
355. juggling soccer ball
356. jumping
357. jumping bicycle
358. jumping into pool
359. jumping jacks
360. jumping sofa
361. jumpstyle dancing
362. karaoke
363. kick (football)
364. kickboxing
365. kickflip
366. kicking field goal
367. kicking soccer ball
368. kissing
369. kitesurfing
370. knitting
371. krumping
372. land sailing
373. landing airplane
374. laughing
375. lawn mower racing
376. laying bricks
377. laying concrete
378. laying decking
379. laying stone
380. laying tiles
381. leatherworking
382. letting go of balloon
383. licking
384. lifting hat
385. lighting
386. lighting candle
387. lighting fire
388. listening with headphones
389. lock picking
390. logging
391. long jump
392. longboarding
393. looking at phone
394. looking in mirror
395. luge
396. lunge
397. making a cake
398. making a sandwich
399. making balloon shapes
400. making bed
401. making bubbles
402. making cheese
403. making horseshoes
404. making jewelry
405. making latte art
406. making paper aeroplanes
407. making pizza
408. making snowman
409. making sushi
410. making tea
411. making the bed
412. manicure
413. manufacturing
414. marching
415. marching band
416. marimba
417. marriage proposal
418. massaging back
419. massaging feet
420. massaging legs
421. massaging neck
422. mechanic
423. metal detecting
424. metal working
425. milking cow
426. milking goat
427. minibike
428. mixing colours
429. model building
430. monster truck
431. moon walking
432. mopping floor
433. mosh pit dancing
434. motocross

435. motorcycling
436. mountain biking
437. mountain climber (exercise)
438. moving baby
439. moving child
440. moving furniture
441. mowing lawn
442. mushroom foraging
443. musical ensemble
444. needle felting
445. news anchoring
446. news presenter
447. nightclub
448. none
449. offroading
450. ollie (skateboarding)
451. omelette
452. opening bottle
453. opening bottle (not wine)
454. opening coconuts
455. opening door
456. opening present
457. opening refrigerator
458. opening wine bottle
459. orchestra
460. origami
461. outdoor recreation
462. packing
463. parade
464. paragliding
465. parasailing
466. parkour
467. passing american football
468. passing soccer ball
469. peeling apples
470. peeling banana
471. peeling potatoes
472. penalty kick (association football)
473. person collecting garbage
474. personal computer
475. petting animal
476. petting animal (not cat)
477. petting cat
478. petting horse
479. photobombing
480. photocopying
481. picking apples
482. picking blueberries
483. picking fruit
484. pilates
485. pillow fight
486. pinching
487. pipe organ
488. pirouetting
489. planing wood
490. planting trees
491. plastering
492. playing accordion
493. playing american football
494. playing badminton
495. playing bagpipes
496. playing banjo
497. playing basketball
498. playing bass guitar
499. playing beer pong
500. playing billiards
501. playing blackjack
502. playing cards
503. playing cello
504. playing checkers
505. playing chess
506. playing clarinet
507. playing controller
508. playing cricket
509. playing cymbals
510. playing darts
511. playing didgeridoo
512. playing dominoes
513. playing drums
514. playing fiddle
515. playing field hockey
516. playing flute
517. playing gong
518. playing guitar
519. playing hand clapping games
520. playing handball
521. playing harmonica
522. playing harp
523. playing ice hockey

- 524. playing keyboard
- 525. playing kickball
- 526. playing laser tag
- 527. playing lute
- 528. playing mahjong
- 529. playing maracas
- 530. playing marbles
- 531. playing monopoly
- 532. playing netball
- 533. playing oboe
- 534. playing ocarina
- 535. playing organ
- 536. playing paintball
- 537. playing pan pipes
- 538. playing piano
- 539. playing piccolo
- 540. playing pinball
- 541. playing ping pong
- 542. playing poker
- 543. playing polo
- 544. playing recorder
- 545. playing road hockey
- 546. playing rounders
- 547. playing rubiks cube
- 548. playing rugby
- 549. playing saxophone
- 550. playing scrabble
- 551. playing shuffleboard
- 552. playing slot machine
- 553. playing snare drum
- 554. playing soccer
- 555. playing squash or racquetball
- 556. playing tennis
- 557. playing timbales
- 558. playing trombone
- 559. playing trumpet
- 560. playing tuba
- 561. playing ukulele
- 562. playing viola
- 563. playing violin
- 564. playing volleyball
- 565. playing with toys
- 566. playing with trains
- 567. playing xylophone
- 568. plumbing
- 569. poaching eggs
- 570. poking bellybutton
- 571. pole vault
- 572. polishing furniture
- 573. polishing metal
- 574. popping balloons
- 575. pouring beer
- 576. pouring milk
- 577. pouring wine
- 578. praying
- 579. preacher
- 580. preparing salad
- 581. presenting weather forecast
- 582. pretending to be a statue
- 583. protesting
- 584. pull ups
- 585. pulling
- 586. pulling espresso shot
- 587. pulling rope
- 588. pulling rope (game)
- 589. pumping fist
- 590. pumping gas
- 591. punching bag
- 592. punching person
- 593. push up
- 594. pushing car
- 595. pushing cart
- 596. pushing wheelbarrow
- 597. pushing wheelchair
- 598. putting on foundation
- 599. putting on lipstick
- 600. putting on sari
- 601. putting on shoes
- 602. putting wallpaper on wall
- 603. queuing
- 604. racing
- 605. radio-controlled model
- 606. rafting
- 607. rain
- 608. rallying
- 609. reading book
- 610. reading newspaper
- 611. recipe
- 612. recording music



- 613. recreational fishing
- 614. repairing puncture
- 615. riding a bike
- 616. riding camel
- 617. riding elephant
- 618. riding mechanical bull
- 619. riding mule
- 620. riding or walking with horse
- 621. riding scooter
- 622. riding snow blower
- 623. riding unicycle
- 624. ripping paper
- 625. roasting
- 626. roasting marshmallows
- 627. roasting pig
- 628. robot dancing
- 629. rock climbing
- 630. rock scissors paper
- 631. rocking
- 632. roller coaster
- 633. roller skating
- 634. rolling pastry
- 635. rope pushdown
- 636. rowing (sport)
- 637. running
- 638. running on treadmill
- 639. sailing
- 640. salsa dancing
- 641. saluting
- 642. sanding floor
- 643. sanding wood
- 644. sausage making
- 645. sawing wood
- 646. scrambling eggs
- 647. scrapbooking
- 648. screen printing
- 649. scrubbing face
- 650. scuba diving
- 651. seasoning food
- 652. separating eggs
- 653. serve (tennis)
- 654. setting table
- 655. sewing
- 656. shaking hands
- 657. shaking head
- 658. shaping bread dough
- 659. sharpening knives
- 660. sharpening pencil
- 661. shaving head
- 662. shaving legs
- 663. shearing sheep
- 664. shining flashlight
- 665. shining shoes
- 666. shooting basketball
- 667. shooting off fireworks
- 668. shopping
- 669. shot put
- 670. shouting
- 671. shoveling snow
- 672. shredding paper
- 673. shrugging
- 674. shucking oysters
- 675. shuffling cards
- 676. shuffling feet
- 677. side kick
- 678. sieving
- 679. sign language interpreting
- 680. silent disco
- 681. singing
- 682. sipping cup
- 683. situp
- 684. skateboarding
- 685. ski ballet
- 686. ski jumping
- 687. skiing crosscountry
- 688. skiing mono
- 689. skiing slalom
- 690. skipping rope
- 691. skipping stone
- 692. sky diving
- 693. skydiving
- 694. slacklining
- 695. slapping
- 696. sled dog racing
- 697. sleeping
- 698. slicing onion
- 699. slopestyle
- 700. smashing
- 701. smelling feet

- 702. smoking
- 703. smoking hookah
- 704. smoking pipe
- 705. smoothie
- 706. snatch weight lifting
- 707. sneezing
- 708. sniffing
- 709. snorkeling
- 710. snowboarding
- 711. snowkiting
- 712. snowmobile
- 713. snowmobiling
- 714. snowplow
- 715. snowshoe
- 716. soccer goal
- 717. somersaulting
- 718. sowing
- 719. speed skating
- 720. spelunking
- 721. spinning plates
- 722. spinning poi
- 723. splashing
- 724. splashing water
- 725. spray painting
- 726. spraying
- 727. springboard diving
- 728. square dancing
- 729. squat
- 730. squeezing orange
- 731. stacking cups
- 732. stacking dice
- 733. standing on hands
- 734. standup paddleboarding
- 735. staring
- 736. stealing
- 737. steer roping
- 738. steering car
- 739. sticking tongue out
- 740. stir frying
- 741. stirring
- 742. stomping grapes
- 743. street racing
- 744. stretching
- 745. stretching arm
- 746. stretching leg
- 747. strumming guitar
- 748. stunt performer
- 749. submerging
- 750. sucking lolly
- 751. sun tanning
- 752. surfing crowd
- 753. surfing water
- 754. surveying
- 755. sweeping floor
- 756. swimming
- 757. swimming backstroke
- 758. swimming breast stroke
- 759. swimming butterfly stroke
- 760. swimming front crawl
- 761. swimming with dolphins
- 762. swimming with sharks
- 763. swing dancing
- 764. swinging baseball bat
- 765. swinging legs
- 766. swinging on something
- 767. sword fighting
- 768. sword swallowing
- 769. tabla
- 770. tackling
- 771. tagging graffiti
- 772. tai chi
- 773. taking a shower
- 774. taking photo
- 775. talking on cell phone
- 776. tango dancing
- 777. tap dancing
- 778. tapping guitar
- 779. tapping pen
- 780. tasting beer
- 781. tasting food
- 782. tasting wine
- 783. teaching
- 784. tearing
- 785. telemark ski
- 786. tennis
- 787. testifying
- 788. texting
- 789. threading needle
- 790. throwing axe

- |                                                        |                                           |
|--------------------------------------------------------|-------------------------------------------|
| 791. throwing ball                                     | 834. using computer                       |
| 792. throwing ball (not baseball or american football) | 835. using inhaler                        |
| 793. throwing discus                                   | 836. using megaphone                      |
| 794. throwing knife                                    | 837. using puppets                        |
| 795. throwing snowballs                                | 838. using remote controller              |
| 796. throwing tantrum                                  | 839. using remote controller (not gaming) |
| 797. throwing water balloon                            | 840. using segway                         |
| 798. thunderstorm                                      | 841. vacuum cleaner                       |
| 799. tickling                                          | 842. vacuuming car                        |
| 800. tie dying                                         | 843. vacuuming floor                      |
| 801. tightrope walking                                 | 844. valuting                             |
| 802. tiptoeing                                         | 845. visiting the zoo                     |
| 803. tobogganing                                       | 846. volcano                              |
| 804. torte                                             | 847. wading through mud                   |
| 805. tossing coin                                      | 848. wading through water                 |
| 806. tossing salad                                     | 849. waiting in line                      |
| 807. train                                             | 850. wakeboarding                         |
| 808. training dog                                      | 851. waking up                            |
| 809. trapezing                                         | 852. walking on stilts                    |
| 810. treating wood                                     | 853. walking the dog                      |
| 811. trimming or shaving beard                         | 854. walking through snow                 |
| 812. trimming shrubs                                   | 855. walking with crutches                |
| 813. trimming trees                                    | 856. washing                              |
| 814. triple jump                                       | 857. washing dishes                       |
| 815. twiddling fingers                                 | 858. washing feet                         |
| 816. tying bow tie                                     | 859. washing hair                         |
| 817. tying knot (not on a tie)                         | 860. washing hands                        |
| 818. tying necktie                                     | 861. washing machine                      |
| 819. tying shoe laces                                  | 862. watching tv                          |
| 820. tying tie                                         | 863. water park                           |
| 821. unboxing                                          | 864. water skiing                         |
| 822. uncorking champagne                               | 865. water sliding                        |
| 823. underwater diving                                 | 866. watercolor painting                  |
| 824. unidentified flying object                        | 867. waterfall                            |
| 825. unloading truck                                   | 868. waterfowl hunting                    |
| 826. using a microscope                                | 869. watering plants                      |
| 827. using a paint roller                              | 870. waving hand                          |
| 828. using a power drill                               | 871. waxing armpits                       |
| 829. using a sledge hammer                             | 872. waxing back                          |
| 830. using a wrench                                    | 873. waxing chest                         |
| 831. using atm                                         | 874. waxing eyebrows                      |
| 832. using bagging machine                             | 875. waxing legs                          |
| 833. using circular saw                                | 876. weaving basket                       |
|                                                        | 877. weaving fabric                       |
|                                                        | 878. wedding                              |
|                                                        | 879. weight lifting                       |

```

action
├── activity
│   ├── applauding
│   ├── backflip
│   ├── backflip (human)
│   ├── bee keeping
│   ├── blowing nose
│   ├── blowing out candles
│   ├── bookbinding
│   ├── bottling
│   ├── braiding hair
│   ├── breaking
│   │   ├── breaking boards
│   │   └── breaking glass
│   ├── bungee jumping
│   ├── buttoning
│   ├── cartwheeling
│   ├── checking watch
│   ├── chewing
│   │   ├── blowing bubble gum
│   │   └── chewing gum
│   ├── clam digging
│   ├── clapping
│   ├── closing door
│   ├── cosplaying
│   ├── counting money
│   └── crafting
│       ├── blowing glass
│       ├── carving
│       │   ├── carving ice
│       │   ├── carving marble
│       │   ├── carving pumpkin
│       │   └── carving wood with a knife
│       ├── chiseling stone
│       ├── chiseling wood
│       ├── clay pottery making
│       ├── crocheting
│       ├── decoupage
│       ├── folding paper
│       │   ├── making paper aeroplanes
│       │   └── origami
│       ├── knitting
│       ├── leatherworking
│       ├── model building
│       ├── ripping paper
│       ├── sewing
│       │   ├── embroidering
│       │   ├── embroidery
│       │   ├── needle felting
│       │   └── threading needle
│       ├── tearing
│       ├── weaving basket
│       ├── weaving fabric
│       └── woodworking

```

- |                         |                       |
|-------------------------|-----------------------|
| 880. welding            | 888. wrapping present |
| 881. whistling          | 889. wrestling        |
| 882. wildlife           | 890. writing          |
| 883. windsurfing        | 891. yarn spinning    |
| 884. winking            | 892. yawning          |
| 885. wood burning (art) | 893. yoga             |
| 886. wood carving       | 894. zumba            |
| 887. woodworking        |                       |

## D Full Hierarchy

```

action
├── activity
│   ├── applauding
│   ├── backflip
│   ├── backflip (human)
│   ├── bee keeping
│   ├── blowing nose
│   ├── blowing out candles
│   ├── bookbinding
│   ├── bottling
│   ├── braiding hair
│   ├── breaking
│   │   ├── breaking boards
│   │   └── breaking glass
│   ├── bungee jumping
│   ├── buttoning
│   ├── cartwheeling
│   ├── checking watch
│   ├── chewing
│   │   ├── blowing bubble gum
│   │   └── chewing gum
│   ├── clam digging
│   ├── clapping
│   ├── closing door
│   ├── cosplaying
│   ├── counting money
│   └── crafting
│       ├── blowing glass
│       ├── carving
│       │   ├── carving ice
│       │   ├── carving marble
│       │   ├── carving pumpkin
│       │   └── carving wood with a knife
│       ├── chiseling stone
│       ├── chiseling wood
│       ├── clay pottery making
│       ├── crocheting
│       ├── decoupage
│       ├── folding paper
│       │   ├── making paper aeroplanes
│       │   └── origami
│       ├── knitting
│       ├── leatherworking
│       ├── model building
│       ├── ripping paper
│       ├── sewing
│       │   ├── embroidering
│       │   ├── embroidery
│       │   ├── needle felting
│       │   └── threading needle
│       ├── tearing
│       ├── weaving basket
│       ├── weaving fabric
│       └── woodworking

```

```

action
├── activity
│   ├── applauding
│   ├── backflip
│   ├── backflip (human)
│   ├── bee keeping
│   ├── blowing nose
│   ├── blowing out candles
│   ├── bookbinding
│   ├── bottling
│   ├── braiding hair
│   ├── breaking
│   │   ├── breaking boards
│   │   └── breaking glass
│   ├── bungee jumping
│   ├── buttoning
│   ├── cartwheeling
│   ├── checking watch
│   ├── chewing
│   │   ├── blowing bubble gum
│   │   └── chewing gum
│   ├── clam digging
│   ├── clapping
│   ├── closing door
│   ├── cosplaying
│   ├── counting money
│   └── crafting
│       ├── blowing glass
│       ├── carving
│       │   ├── carving ice
│       │   ├── carving marble
│       │   ├── carving pumpkin
│       │   └── carving wood with a knife
│       ├── chiseling stone
│       ├── chiseling wood
│       ├── clay pottery making
│       ├── crocheting
│       ├── decoupage
│       ├── folding paper
│       │   ├── making paper aeroplanes
│       │   └── origami
│       ├── knitting
│       ├── leatherworking
│       ├── model building
│       ├── ripping paper
│       ├── sewing
│       │   ├── embroidering
│       │   ├── embroidery
│       │   ├── needle felting
│       │   └── threading needle
│       ├── tearing
│       ├── weaving basket
│       ├── weaving fabric
│       └── woodworking

```

```

action
├── activity
│   ├── applauding
│   ├── backflip
│   ├── backflip (human)
│   ├── bee keeping
│   ├── blowing nose
│   ├── blowing out candles
│   ├── bookbinding
│   ├── bottling
│   ├── braiding hair
│   ├── breaking
│   │   ├── breaking boards
│   │   └── breaking glass
│   ├── bungee jumping
│   ├── buttoning
│   ├── cartwheeling
│   ├── checking watch
│   ├── chewing
│   │   ├── blowing bubble gum
│   │   └── chewing gum
│   ├── clam digging
│   ├── clapping
│   ├── closing door
│   ├── cosplaying
│   ├── counting money
│   └── crafting
│       ├── blowing glass
│       ├── carving
│       │   ├── carving ice
│       │   ├── carving marble
│       │   ├── carving pumpkin
│       │   └── carving wood with a knife
│       ├── chiseling stone
│       ├── chiseling wood
│       ├── clay pottery making
│       ├── crocheting
│       ├── decoupage
│       ├── folding paper
│       │   ├── making paper aeroplanes
│       │   └── origami
│       ├── knitting
│       ├── leatherworking
│       ├── model building
│       ├── ripping paper
│       ├── sewing
│       │   ├── embroidering
│       │   ├── embroidery
│       │   ├── needle felting
│       │   └── threading needle
│       ├── tearing
│       ├── weaving basket
│       ├── weaving fabric
│       └── woodworking

```

```

action
├── activity
│   ├── applauding
│   ├── backflip
│   ├── backflip (human)
│   ├── bee keeping
│   ├── blowing nose
│   ├── blowing out candles
│   ├── bookbinding
│   ├── bottling
│   ├── braiding hair
│   ├── breaking
│   │   ├── breaking boards
│   │   └── breaking glass
│   ├── bungee jumping
│   ├── buttoning
│   ├── cartwheeling
│   ├── checking watch
│   ├── chewing
│   │   ├── blowing bubble gum
│   │   └── chewing gum
│   ├── clam digging
│   ├── clapping
│   ├── closing door
│   ├── cosplaying
│   ├── counting money
│   └── crafting
│       ├── blowing glass
│       ├── carving
│       │   ├── carving ice
│       │   ├── carving marble
│       │   ├── carving pumpkin
│       │   └── carving wood with a knife
│       ├── chiseling stone
│       ├── chiseling wood
│       ├── clay pottery making
│       ├── crocheting
│       ├── decoupage
│       ├── folding paper
│       │   ├── making paper aeroplanes
│       │   └── origami
│       ├── knitting
│       ├── leatherworking
│       ├── model building
│       ├── ripping paper
│       ├── sewing
│       │   ├── embroidering
│       │   ├── embroidery
│       │   ├── needle felting
│       │   └── threading needle
│       ├── tearing
│       ├── weaving basket
│       ├── weaving fabric
│       └── woodworking

```



- └─ treating wood
- └─ woodworking
  - └─ planing wood
  - └─ sanding wood
  - └─ sawing wood
  - └─ using circular saw
  - └─ wood burning
  - └─ wood burning (art)
  - └─ wood carving
- └─ crossing eyes
- └─ crouching
- └─ crying
  - └─ throwing tantrum
- └─ dancing
  - └─ belly dancing
  - └─ breakdancing
  - └─ caporales
  - └─ country line dancing
  - └─ cumbia
  - └─ dancing ballet
  - └─ dancing charleston
  - └─ dancing gangnam style
  - └─ dancing macarena
  - └─ flamenco
  - └─ headbanging
  - └─ jumpstyle dancing
  - └─ krumping
  - └─ marimba
  - └─ moon walking
  - └─ mosh pit dancing
  - └─ nightclub
  - └─ pirouetting
  - └─ pumping fist
  - └─ robot dancing
  - └─ salsa dancing
  - └─ shuffling feet
  - └─ silent disco
  - └─ square dancing
  - └─ swing dancing
  - └─ tango dancing
  - └─ tap dancing
- └─ drooling
- └─ dumpster diving
- └─ eating
  - └─ burping
  - └─ dining
    - └─ setting table
  - └─ drinking
    - └─ drinking beer
    - └─ drinking shots
    - └─ sipping cup
    - └─ tasting beer
    - └─ tasting wine
  - └─ eating burger

- eating cake
- eating carrots
- eating chips
- eating doughnuts
- eating hotdog
- eating ice cream
- eating nachos
- eating spaghetti
- eating street food
- eating watermelon
- sucking lolly
- tasting food
- entering church
- exercise
  - aerobics
  - battle rope training
  - bodyweight exercise
  - canoeing or kayaking
  - doing aerobics
  - exercising arm
  - exercising with an exercise ball
  - gymnastics
    - acrobatic gymnastics
    - balance beam
    - gymnastics tumbling
    - somersaulting
    - valuting
  - hula hooping
  - lunge
  - martial arts
    - capoeira
    - kickboxing
  - mountain climber
  - mountain climber (exercise)
  - parkour
  - pilates
  - pull ups
  - punching
    - punching bag
    - punching person
    - punching person (boxing)
  - push up
  - rope pushdown
  - running
    - chasing
    - jogging
    - running on treadmill
  - situp
  - standing on hands
  - standup paddleboarding
  - stretching
    - bending back
    - contorting
    - cracking back

- cracking knuckles
- cracking neck
- stretching arm
- stretching leg
- yoga
- tai chi
- walking
  - crawling baby
  - delivering mail
  - jaywalking
  - marching
  - tightrope walking
  - tiptoeing
  - wading
    - wading through mud
    - wading through water
  - walking on stilts
  - walking the dog
  - walking through snow
  - walking with crutches
- weight lifting
  - barbell
  - bench pressing
  - biceps curl
  - carrying weight
  - clean and jerk
  - deadlifting
  - dumbbell
  - front raises
  - snatch weight lifting
  - squat
- zumba
- falling
  - faceplanting
  - falling off bike
  - falling off chair
- fidgeting
- finger movement
  - drumming fingers
  - finger snapping
  - fingerboard (skateboard)
  - tapping pen
  - twiddling fingers
  - tying knot
    - tying bow tie
    - tying knot (not on a tie)
    - tying necktie
    - tying shoe laces
    - tying tie
- flipping bottle
- flying kite
- gambling
  - playing poker
  - playing slot machine

- garbage collecting
- gliding
- gold panning
- head stand
- historical reenactment
- hitchhiking
- jumping
  - diving cliff
  - jumping bicycle
  - jumping into pool
  - jumping jacks
  - jumping sofa
  - ski jumping
  - skipping rope
  - triple jump
- land sailing
- laughing
- letting go of balloon
- licking
- lifting hat
- lighting candle
- listening with headphones
- lock picking
- looking at phone
- looking in mirror
- making bubbles
- making snowman
- manipulating
  - adjusting glasses
  - arranging flowers
  - stacking
    - stacking cups
- marriage proposal
- metal detecting
- moving
  - carrying baby
  - moving baby
  - moving child
  - moving furniture
- mushroom foraging
- opening
  - opening bottle
    - opening bottle (not wine)
    - opening wine bottle
    - uncorking champagne
  - opening door
  - opening present
  - opening refrigerator
  - unboxing
- paragliding
- parasailing
- person collecting garbage
- pinching
- playing

- bouncing ball
- bouncing ball (not juggling)
- bouncing on bouncy castle
- bouncing on trampoline
- building sandcastle
- egg hunting
- hopscotch
- playing american football
  - kicking field goal
  - passing american football
  - passing american football (in game)
- playing badminton
- playing board game
  - doing jigsaw puzzle
- playing controller
- playing games
  - playing beer pong
  - playing cards
    - card stacking
    - card throwing
    - card tricks
    - dealing cards
    - playing blackjack
    - shuffling cards
  - playing checkers
  - playing chess
  - playing dominoes
  - playing mahjong
  - playing monopoly
  - playing pinball
  - playing scrabble
  - playing shuffleboard
  - rock scissors paper
- playing hand clapping games
- playing laser tag
- playing paintball
- playing toys
  - playing marbles
  - playing rubiks cube
  - radio-controlled model
- playing with toys
  - building lego
  - playing with trains
  - train
- pulling rope
- pulling rope (game)
- spinning plates
- spinning poi
- stacking dice
- using puppets
- using remote controller
- using remote controller (not gaming)
- water sliding
- praying

- pretending to be a statue
- pulling
- pumping gas
- pushing
  - pushing car
  - pushing cart
  - pushing wheelbarrow
  - pushing wheelchair
- reading
  - reading book
  - reading newspaper
- riding mechanical bull
- rocking
- saluting
- scrapbooking
- screen printing
- shopping
- shredding paper
- shrugging
- sieving
- sign language interpreting
- sitting
- sky diving
- skydiving
- slacklining
- sledding
  - tobogganing
- smashing
- smelling feet
- smoking
  - smoking hookah
  - smoking pipe
- sneezing
- sniffing
- sports
  - archery
  - arm wrestling
  - base jumping
  - bicycle
    - assembling bicycle
  - bobsledding
  - bodyboarding
  - bowling
  - bull fighting
  - catching or throwing frisbee
  - catching or throwing softball
  - cheerleading
  - cricket
  - curling
  - curling (sport)
  - diving
    - springboard diving
    - underwater diving
  - dodgeball

- enduro
- extreme sport
- extreme sports
- fencing
- fencing (sport)
- field hockey
- frisbee
  - disc golfing
- golfing
  - golf chipping
  - golf driving
  - golf putting
- hammer throw
- high jump
- huddling
- hurdling
- hurling
- hurling (sport)
- ice skating
  - figure skating
  - ice dancing
  - speed skating
- javelin throw
- long jump
- luge
- playing baseball
  - batting cage
  - catching or throwing baseball
  - hitting baseball
  - swinging baseball bat
- playing basketball
  - dribbling basketball
  - dunking basketball
  - shooting basketball
- playing billiards
- playing cricket
  - batting (cricket)
  - bowling (cricket)
- playing darts
- playing field hockey
- playing handball
- playing ice hockey
  - hockey stop
- playing kickball
- playing netball
- playing ping pong
- playing road hockey
- playing rounders
- playing rugby
- playing soccer
  - juggling soccer ball
  - kick (football)
  - kicking soccer ball
  - passing soccer ball

- penalty kick (association football)
  - shooting goal
  - shooting goal (soccer)
  - soccer goal
- playing squash or racquetball
- playing tennis
  - serve (tennis)
- playing volleyball
- pole vault
- racing
  - dirt track racing
  - horse racing
  - lawn mower racing
  - racings
  - sled dog racing
- roller skating
- rowing (sport)
- shot put
- skateboarding
  - kickflip
  - longboarding
  - ollie (skateboarding)
- snowboarding
- snowkiting
- surfing
  - bodysurfing
  - kitesurfing
  - surfing crowd
  - surfing water
  - windsurfing
- tackling
- spraying
- sticking tongue out
- stomping grapes
- stunt performer
- submerging
- sun tanning
- swinging
  - swinging legs
  - swinging on something
- taking photo
  - photobombing
- talking
  - acting in play
  - answering questions
  - arguing
  - attending conference
  - auctioning
  - preacher
  - shouting
  - talking on cell phone
  - teaching
  - testifying
  - using megaphone



- throwing
  - skipping stone
  - throwing axe
  - throwing ball
  - throwing ball (not baseball or american football)
  - throwing discus
  - throwing knife
  - throwing snowballs
  - throwing water balloon
- tickling
- tie dying
- tossing coin
- using phone
  - texting
- waiting in line
- whistling
- winking
- working
  - surveying
  - unloading truck
- writing
  - calligraphy
  - doing sudoku
- yarn spinning
- yawning
- animal
  - dog
    - dog agility
  - farming
    - milking cow
    - milking goat
    - steer roping
  - feeding birds
  - feeding fish
  - feeding goats
  - grooming
    - grooming cat
    - grooming dog
    - grooming horse
  - herding cattle
  - holding snake
  - riding camel
  - riding elephant
  - riding mule
  - riding or walking with horse
    - dressage
  - shearing sheep
  - training dog
  - visiting the zoo
  - wildlife
- art
  - airbrush
  - drawing
    - coloring in

- mixing colours
  - painting
  - painting panels
  - spray painting
  - tagging graffiti
  - using a paint roller
  - watercolor painting
- 
- cooking
    - baking
      - baking cookies
      - barbecuing
      - barbecuing sausages
      - blending fruit
      - breeding or breadcrumbing
      - cake decorating
      - cooking chicken
      - cooking egg
      - cooking on campfire
      - roasting marshmallows
      - cooking sausages (not on barbeque)
      - cooking scallops
      - cooking stew
      - cutting
        - chopping meat
        - chopping vegetables
        - slicing onion
        - chopping wood
        - cutting cake
        - cutting fruit
          - cutting apple
          - cutting orange
          - cutting pineapple
          - cutting watermelon
          - opening coconuts
          - cutting nails
        - flipping pancakes
        - frying
          - frying vegetables
        - grilling meat
        - grilling coffee
        - making a cake
          - filling cake
          - torte
        - making a sandwich
        - making cheese
        - making latte art
        - making pizza
        - making sushi
        - making tea
        - making toast
        - peeling fruit
          - peeling apples
          - peeling banana
          - peeling potatoes

- poaching eggs
- pouring
  - pouring beer
  - pouring milk
  - pouring wine
  - pulling espresso shot
- preparing salad
- recipe
- roasting
- roasting pig
- rolling pastry
- sausage making
- scrambling eggs
- seasoning food
- separating eggs
- shaping bread dough
- sharpening knives
- shucking oysters
- smoothie
- squeezing orange
- stir frying
- stirring
- tossing salad
- entertainment
  - making balloon shapes
- event
  - celebrating
  - circus
    - trapezing
  - entertainment
    - balloon blowing
    - comedian
    - inflating balloons
    - juggling
      - contact juggling
      - juggling balls
    - popping balloons
    - sword swallowing
  - festival
  - giving or receiving award
  - news
    - news anchoring
    - news presenter
    - presenting weather forecast
  - parade
  - wedding
- explosion
  - demolition
- fire
  - breathing fire
  - extinguishing fire
  - firefighter
  - fireworks
  - juggling fire

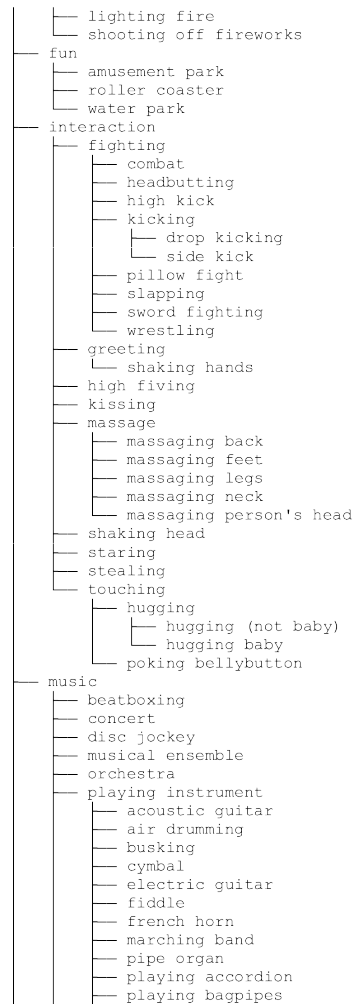

- playing banjo
- playing bass guitar
- playing cello
- playing clarinet
- playing cymbals
- playing didgeridoo
- playing drums
  - └─ tabla
- playing fiddle
- playing flute
- playing gong
- playing guitar
  - └─ strumming guitar
- playing harmonica
- playing harp
- playing keyboard
- playing lute
- playing maracas
- playing oboe
- playing ocarina
- playing organ
- playing pan pipes
- playing piano
- playing piccolo
- playing recorder
- playing saxophone
- playing snare drum
- playing timbales
- playing trombone
- playing trumpet
- playing tuba
- playing ukulele
- playing viola
- playing violin
- playing xylophone
- snare drum
- tapping guitar
- timbales
- viola
- recording music
  - └─ singing
    - └─ gospel singing in church
    - └─ karaoke
- none
- outdoors
  - └─ abseiling
  - └─ alligator wrestling
  - └─ archaeological excavation
  - └─ backpacking (wilderness)
  - └─ camping
    - └─ flint knapping
  - └─ climbing
    - └─ alpine climbing
    - └─ climbing a rope

- climbing ladder
- climbing tree
- ice climbing
- rock climbing
- dashcam
- digging
- fishing
  - carp fishing
  - casting fishing line
  - catching fish
  - fly tying
  - ice fishing
  - recreational fishing
- gardening
  - picking fruit
    - picking apples
    - picking blueberries
  - planting trees
  - sowing
  - trimming shrubs
  - trimming trees
  - watering plants
- hiking
  - geocaching
  - snowshoe
  - spelunking
- hunting
  - waterfowl hunting
- outdoor recreation
- riding snow blower
- skiing
  - alpine skiing
  - ski ballet
  - skiing crosscountry
  - skiing mono
  - skiing slalom
  - slopestyle
  - telemark ski
- volcano
- waterfall
- yardwork
  - blowing leaves
  - mowing lawn
  - shoveling snow
- personal computer
- queuing
- riding a bike
- setting
  - home activity
    - baby waking up
    - beauty
      - blowdrying hair
      - body piercing
      - curling hair

- doing nails
- dyeing hair
- dying hair
- filling eyebrows
- fixing hair
- gargling
- getting a haircut
- getting a piercing
- getting a tattoo
- hair coloring
- ironing hair
- makeup
  - applying cream
  - putting on eyeliner
  - putting on foundation
  - putting on lipstick
  - putting on mascara
- manicure
- scrubbing face
- shaving
  - shaving head
  - shaving legs
- trimming or shaving beard
- waxing
  - waxing hand
  - waxing armpits
  - waxing back
  - waxing chest
  - waxing eyebrows
  - waxing legs
- brushing
  - brushing hair
  - brushing teeth
- christmas
- cleaning
  - bathing
    - bathing dog
    - taking a shower
  - blasting sand
  - brushing floor
  - cleaning floor
  - cleaning gutters
  - cleaning pool
  - cleaning shoes
  - cleaning toilet
  - cleaning windows
  - making bed
  - making the bed
  - mopping floor
  - polishing furniture
  - shining shoes
  - sweeping floor
  - vacuuming
    - vacuum cleaner

- vacuuming car
    - vacuuming floor
  - decorating the christmas tree
  - dressings
    - putting on sari
      - putting on shoes
  - folding
      - folding clothes
      - folding napkins
  - home improvement
      - installing carpet
      - laying tiles
      - plumbing
      - putting wallpaper on wall
      - sanding floor
  - ironing
  - packing
  - sleeping
  - waking up
  - washing
      - washing dishes
      - washing feet
      - washing hair
      - washing hands
    - washing clothes
        - doing laundry
        - hand washing clothes
        - washing machine
  - watching tv
  - wrapping present
  - lighting
      - shining flashlight
  - medical
      - bandaging
      - using inhaler
  - office work
      - photocopying
      - sharpening pencil
      - using computer
      - using atm
- snowmobile
- tennis
- toy
- transportation
    - air travel
        - aircraft
        - landing airplane
        - unidentified flying object
    - baby transport
    - bicycling
        - biking through snow
        - bmx bike
        - doing wheelie
        - minibike



- building
  - building cabinet
  - building shed
- bulldozer
- bulldozing
- dump truck
- heavy equipment
- laying bricks
- laying concrete
- laying decking
- laying stone
- electronics
  - assembling computer
- forklift
- logging
- manufacturing
  - metal working
    - bending metal
    - making horseshoes
    - making jewelry
    - polishing metal
    - welding
- mechanic
  - changing oil
  - changing wheel
  - changing wheel (not on bike)
  - checking tires
  - repairing puncture
- plastering
- police
  - arresting
  - directing traffic
  - protesting
- using tools
  - using a microscope
  - using a power drill
  - using a sledge hammer
  - using a wrench
  - using bagging machine

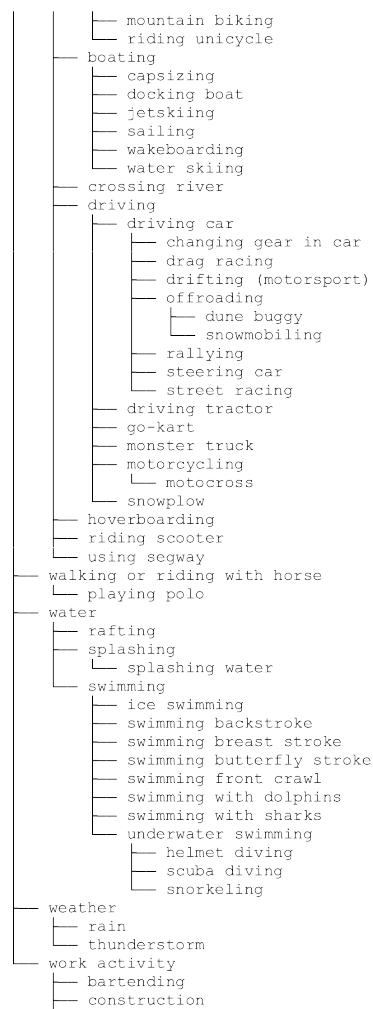

Figure 1: Full AViD hierarchy
